# Supplementary material
Source: PubMed Central journal article supplement (PMC539790)

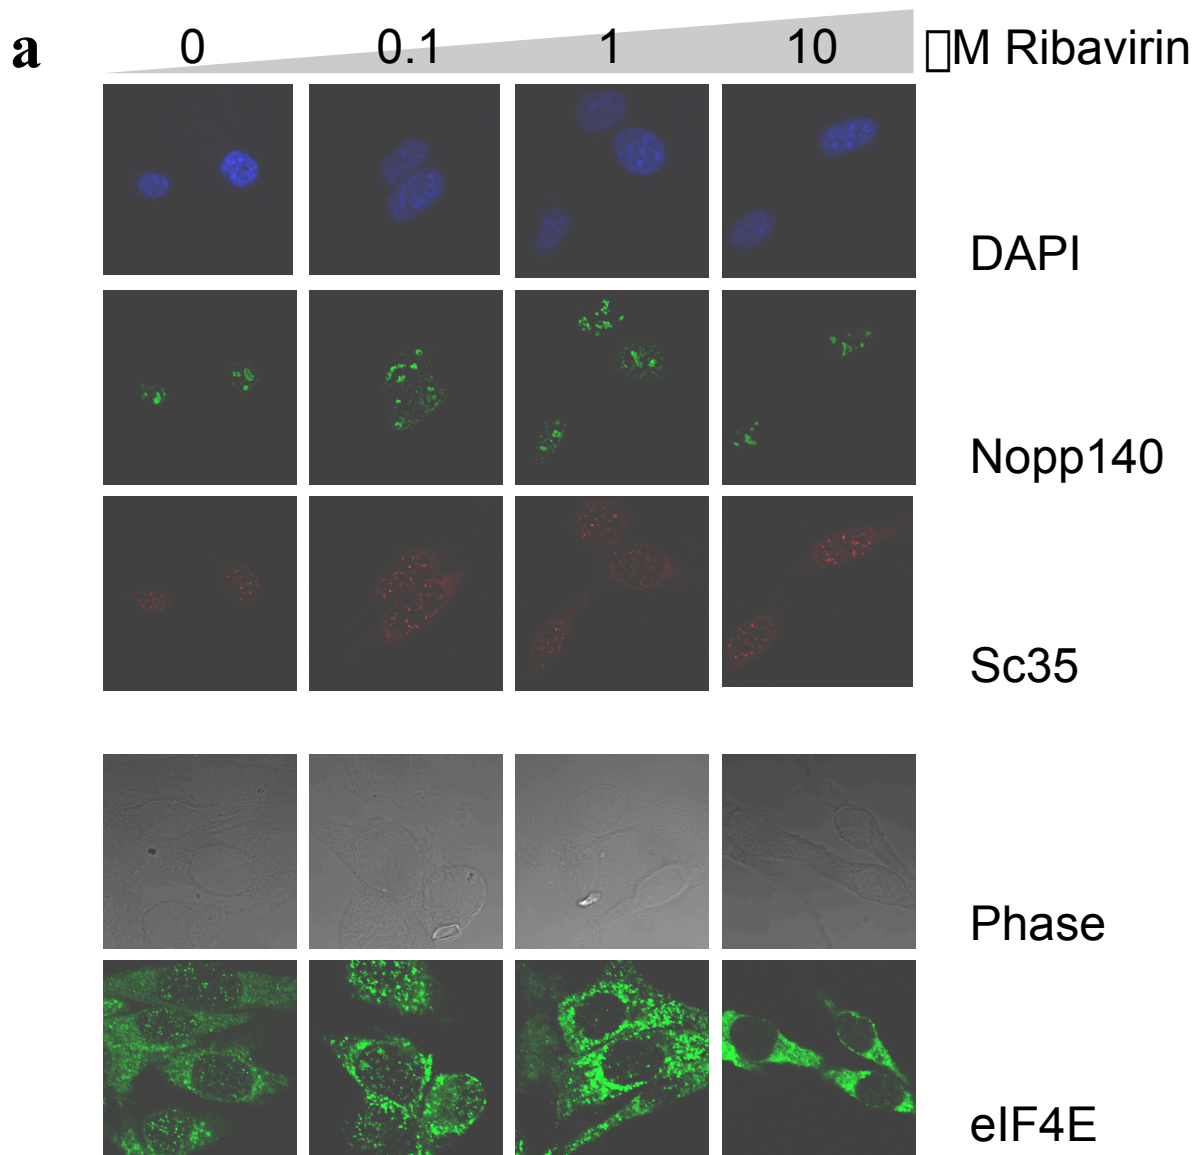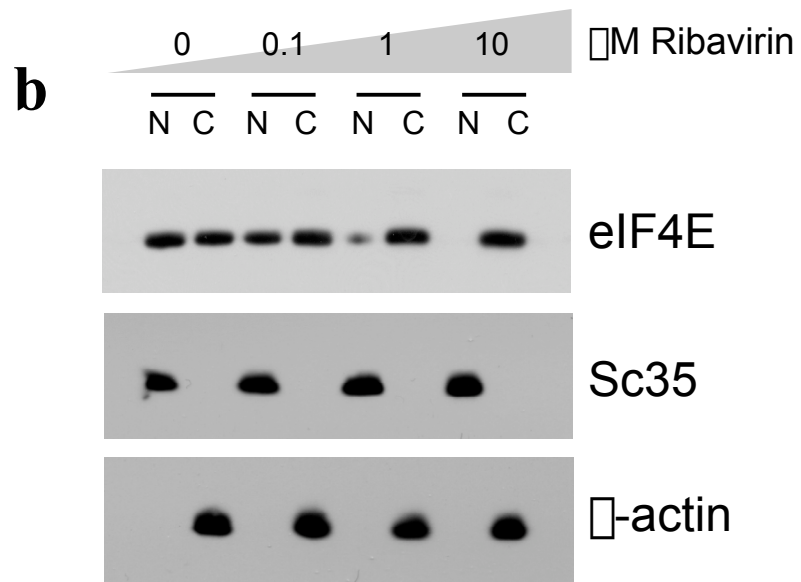

Supplement: pnas_101_52_18105__2.pdf [file pnas_101_52_18105__2.pdf]

a

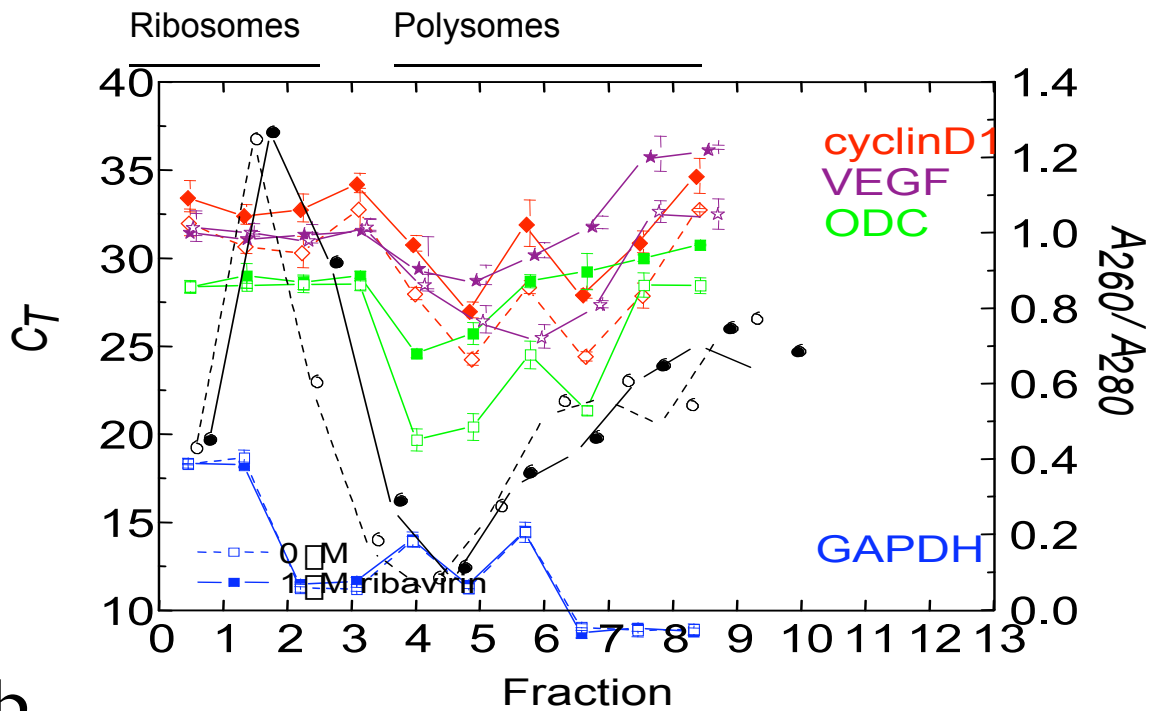

b

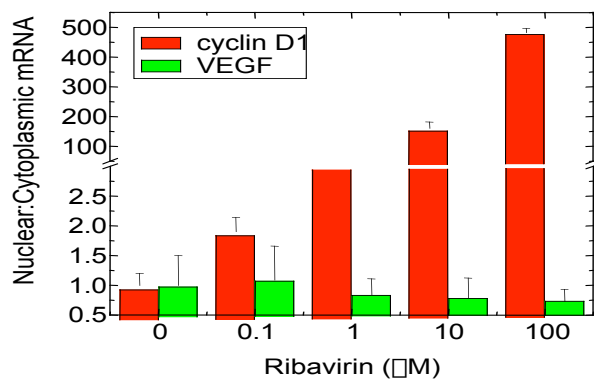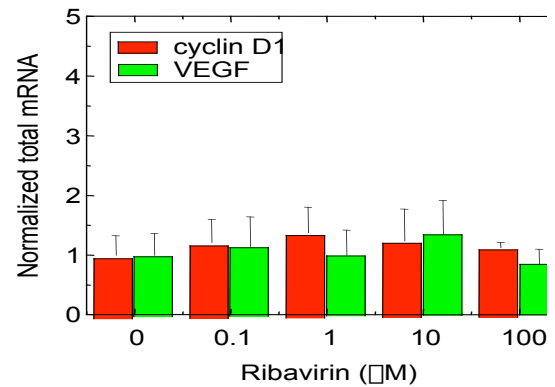

Supplement: pnas_101_52_18105__3.pdf [file pnas_101_52_18105__3.pdf]

**a**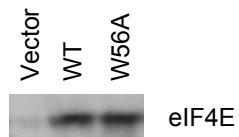**c**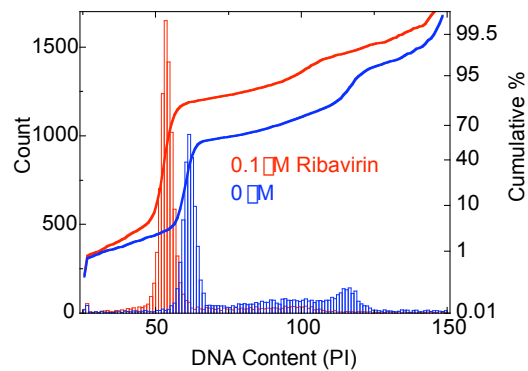**b**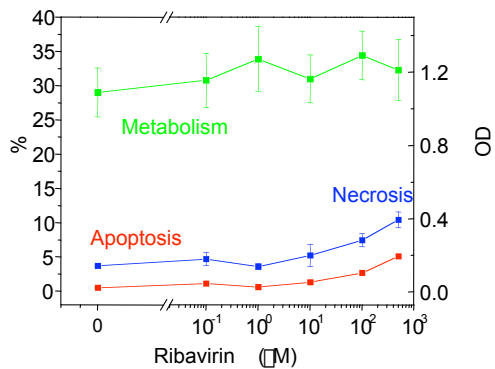

Supplement: pnas_101_52_18105__4.pdf [file pnas_101_52_18105__4.pdf]

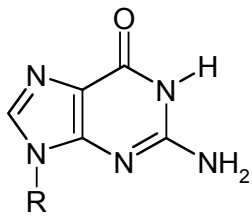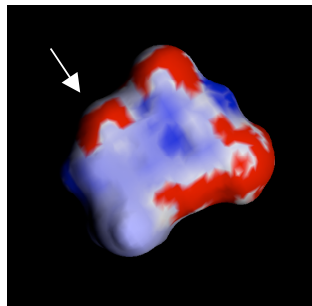

guanosine

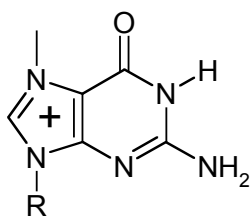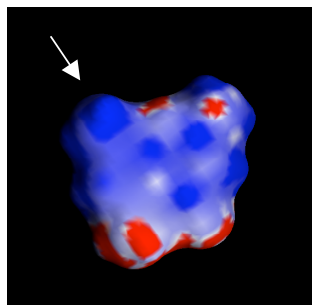

m<sup>7</sup>-guanosine

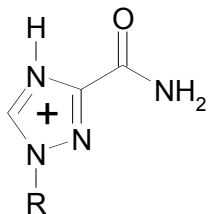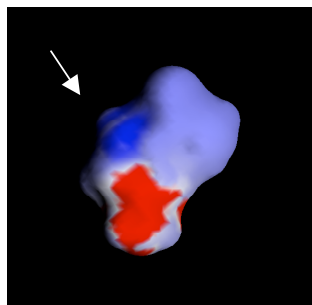

ribavirin

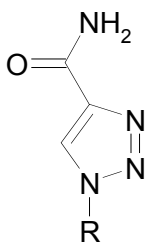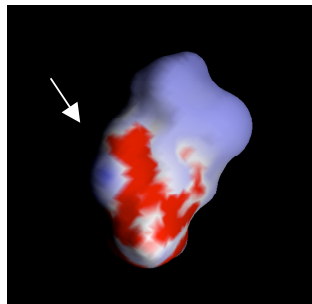

rib4c

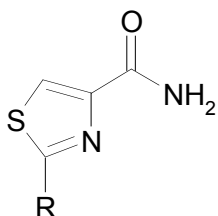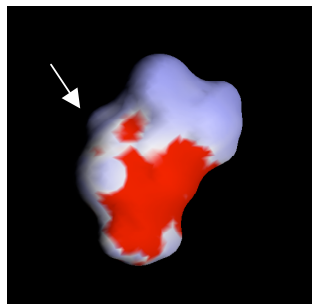

tiazofurin

Supplement: pnas_101_52_18105__5.pdf [file pnas_101_52_18105__5.pdf]
